# Supplementary material for: Chemical Ecosystem Selection on Mineral Surfaces Reveals Long-Term Dynamics Consistent with the Spontaneous Emergence of Mutual Catalysis
Source: MDPI journal article supplement (doi:10.3390/life9040080), 2019-10-23
Supplement: s1 [file s1]

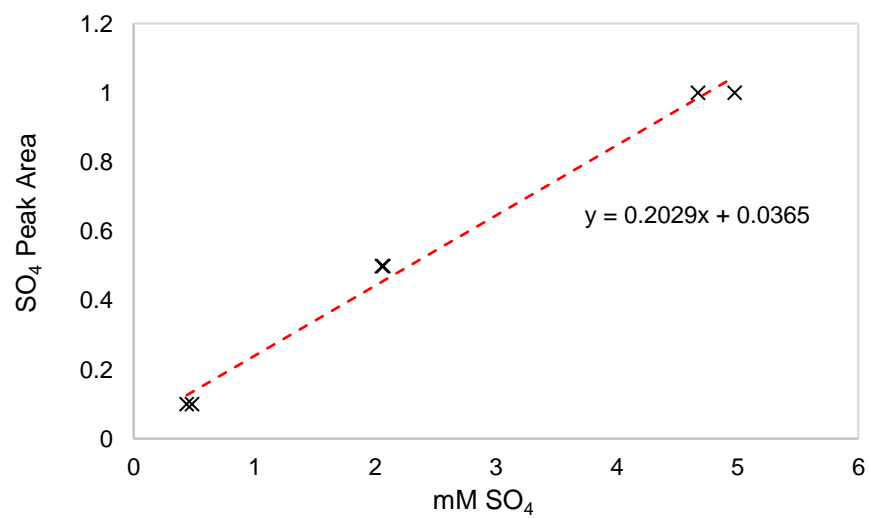

**Figure S2:** Ion chromatography sulfate standard curve used to determine the amount of sulfate released by pyrite mineral to estimate the extent of pyrite oxidation after acid washing. Pyrite washed using the protocol described in the main text produced >0.05 mM SO<sub>4</sub>.
