# Supplementary material for: Chemical Ecosystem Selection on Mineral Surfaces Reveals Long-Term Dynamics Consistent with the Spontaneous Emergence of Mutual Catalysis
Source: MDPI journal article supplement (doi:10.3390/life9040080), 2019-10-23
Supplement: s1 [file s1]

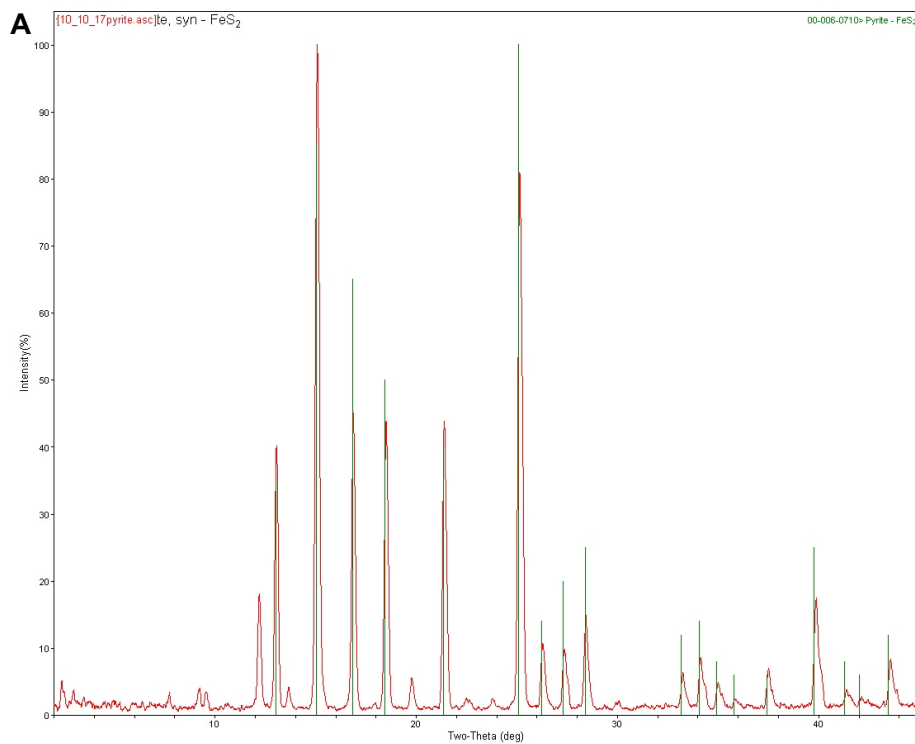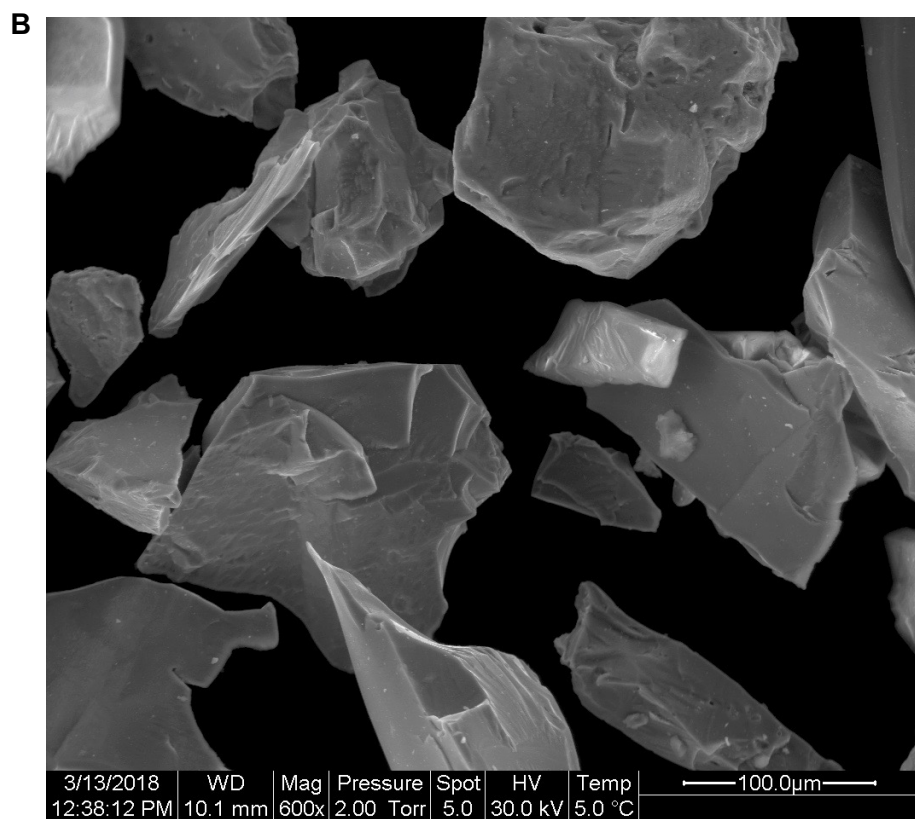

**Figure S1:** (A) X-ray diffractogram of washed high-grade natural pyrite powder (50 kV; 50 mA; 60 min exposure). (B) ESEM of washed pyrite grains (30 kV; 5.0 spot; 2.00 torr).
