# Supplementary material for: Chemical Ecosystem Selection on Mineral Surfaces Reveals Long-Term Dynamics Consistent with the Spontaneous Emergence of Mutual Catalysis
Source: MDPI journal article supplement (doi:10.3390/life9040080), 2019-10-23
Supplement: s1 [file s1]

**Table S2.** Outputs of ANOVA and Tukey-HSD tests used to determine the statistical significance of differences among controls in experiment 2.

| <b>One-Way ANOVA</b> | Df | Sum Sq | Mean Sq | F-value | <i>p</i> -value |
|----------------------|----|--------|---------|---------|-----------------|
| Generation           | 3  | 4569   | 1523    | 8.843   | <0.001          |
| Residuals            | 35 | 6028   | 172.2   |         |                 |

| <b>Tukey-HSD Post-Hoc Test</b> | <i>p</i> -value |
|--------------------------------|-----------------|
| gen18-gen12                    | 0.24            |
| gen6-gen12                     | 0.05            |
| gen6-gen18                     | 0.85            |
| gen6-gen24                     | 0.09            |
| gen24-gen12                    | 0.00            |
| gen24-gen18                    | 0.01            |
