# Supplementary material for: Chemical Ecosystem Selection on Mineral Surfaces Reveals Long-Term Dynamics Consistent with the Spontaneous Emergence of Mutual Catalysis
Source: MDPI journal article supplement (doi:10.3390/life9040080), 2019-10-23
Supplement: s1 [file s1]

**Table S1.** Detailed composition of the final EPS soup.

| <b>Chemical Name</b>                 | <b>Vendor</b>       | <b>CAS #</b> | <b>Concentration (mM)</b> |
|--------------------------------------|---------------------|--------------|---------------------------|
| <b>1,3-dihydroxyacetone</b>          | Fisher Scientific   | 96-26-4      | 0.32                      |
| <b>2-aminobutyric acid</b>           | Acros Organics      | 2835-81-6    | 0.08                      |
| <b>acetoguanamine</b>                | VWR                 | 541-02-9     | 0.16                      |
| <b>adenine</b>                       | Fisher Scientific   | 73-24-5      | 0.32                      |
| <b>adenosine triphosphate</b>        | Sigma-Aldrich       | 34369-07-8   | 0.32                      |
| <b>ammonium chloride</b>             | Sigma-Aldrich       | 12125-02-9   | 20                        |
| <b>ammonium persulfate</b>           | IBI Scientific      | 7727-54-0    | 0.04                      |
| <b>β-alanine</b>                     | Tokyo Chemical      | 107-95-9     | 0.32                      |
| <b>butyric acid (sodium salt)</b>    | Fisher Scientific   | 156-54-7     | 0.08                      |
| <b>cobalt(II) chloride anhydrous</b> | BTC Chemicals       | 7646-79-9    | 10 <sup>-5</sup>          |
| <b>copper(II) chloride dihydrate</b> | Alfa Aesar          | 10125-13-0   | 10 <sup>-5</sup>          |
| <b>cytosine</b>                      | Fisher Scientific   | 71-30-7      | 0.32                      |
| <b>D-(-)-ribose</b>                  | Fisher Scientific   | 50-69-1      | 0.16                      |
| <b>D-(+)-xylose</b>                  | Fisher Scientific   | 58-86-6      | 0.16                      |
| <b>D-(+)-glucose</b>                 | DOT Scientific Inc. | 50-99-7      | 0.16                      |
| <b>DL-arabinose</b>                  | VWR                 | 147-81-9     | 0.16                      |
| <b>formic acid 90%</b>               | Aqua Solutions      | 64-18-6      | 0.64                      |
| <b>glycerol</b>                      | DOT Scientific Inc. | 56-81-5      | 0.32                      |
| <b>glycolic acid</b>                 | Acros Organics      | 79-14-1      | 0.32                      |
| <b>hydroxybutyric acid</b>           | Sigma-Aldrich       | 150-83-4     | 0.08                      |
| <b>iminodiacetic acid</b>            | VWR                 | 142-73-4     | 0.16                      |
| <b>L-alanine</b>                     | VWR                 | 56-41-7      | 0.32                      |
| <b>L-arginine</b>                    | Sigma-Aldrich       | 74-79-3      | 0.16                      |
| <b>L-ascorbic acid</b>               | DOT Scientific Inc. | 50-81-7      | 0.04                      |
| <b>L-asparagine</b>                  | Acros Organics      | 5794-13-8    | 0.16                      |
| <b>L-aspartic acid</b>               | Alfa Aesar          | 56-84-8      | 0.32                      |
| <b>L-cysteine</b>                    | DOT Scientific Inc. | 52-90-4      | 0.16                      |
| <b>L-glutamic Acid</b>               | VWR                 | 56-86-0      | 0.32                      |
| <b>L-glutamine</b>                   | Sigma-Aldrich       | 56-85-9      | 0.16                      |
| <b>L-glycine</b>                     | Sigma-Aldrich       | 54-40-6      | 0.32                      |
| <b>L-histidine</b>                   | DOT Scientific Inc. | 71-00-1      | 0.08                      |
| <b>L-isoleucine</b>                  | DOT Scientific Inc. | 73-32-5      | 0.16                      |
| <b>L-leucine</b>                     | DOT Scientific Inc. | 61-90-5      | 0.32                      |
| <b>L-lysine</b>                      | DOT Scientific Inc. | 657-27-2     | 0.32                      |
| <b>L-methionine</b>                  | DOT Scientific Inc. | 63-68-3      | 0.08                      |
| <b>L-phenylalanine</b>               | DOT Scientific Inc. | 63-91-2      | 0.16                      |

|                                        |                     |            |                      |
|----------------------------------------|---------------------|------------|----------------------|
| <b>L-proline</b>                       | Alfa Aesar          | 147-85-3   | 0.16                 |
| <b>L-serine</b>                        | DOT Scientific Inc. | 56-45-1    | 0.32                 |
| <b>L-threonine</b>                     | DOT Scientific Inc. | 72-19-5    | 0.32                 |
| <b>L-tryptophan</b>                    | DOT Scientific Inc. | 73-22-3    | 0.08                 |
| <b>L-tyrosine</b>                      | Amresco             | 60-18-4    | 0.16                 |
| <b>L-valine</b>                        | DOT Scientific Inc. | 72-18-4    | 0.32                 |
| <b>lactic acid 88% solution</b>        | Fisher Scientific   | 50-21-5    | 0.16                 |
| <b>magnesium chloride</b>              | DOT Scientific Inc. | 7791-18-6  | 50                   |
| <b>N-ethanolamine</b>                  | Sigma-Aldrich       | 141-43-5   | 0.08                 |
| <b>N-methylalanine</b>                 | Sigma-Aldrich       | 3913-67-5  | 0.08                 |
| <b>N-methylglycine</b>                 | Acros Organics      | 107-97-1   | 0.16                 |
| <b>N-methylurea</b>                    | Fisher Scientific   | 759-73-9   | 0.08                 |
| <b>nickel(II) chloride hexahydrate</b> | Chem-IMPEX Int'l    | 7791-20-0  | $4 \times 10^{-4}$   |
| <b>nicotinamide</b>                    | DOT Scientific Inc. | 98-92-0    | 0.08                 |
| <b>potassium chloride</b>              | VWR                 | 7447-40-7  | 10                   |
| <b>propionic acid</b>                  | Fisher Scientific   | 79-09-4    | 0.16                 |
| <b>pyruvic acid</b>                    | Fisher Scientific   | 127-17-3   | 0.08                 |
| <b>R-pantetheine</b>                   | Sigma-Aldrich       | 496-65-1   | 0.04                 |
| <b>sodium bisulfite</b>                | Ward's              | 7631-90-5  | 0.08                 |
| <b>sodium chloride</b>                 | Fisher Scientific   | 7647-14-5  | 500                  |
| <b>sodium molybdate</b>                | Strem Chemicals     | 10102-40-6 | $10^{-5}$            |
| <b>sodium nitrate</b>                  | Sigma-Aldrich       | 7631-99-4  | 20                   |
| <b>succinic acid</b>                   | Sigma-Aldrich       | 110-15-6   | 0.08                 |
| <b>succinonitrile</b>                  | VWR                 | 110-61-2   | 0.16                 |
| <b>thymine</b>                         | Fisher Scientific   | 65-71-4    | 0.32                 |
| <b>uracil</b>                          | VWR                 | 66-22-8    | 0.32                 |
| <b>urea</b>                            | IBI Scientific      | 57-13-6    | 0.16                 |
| <b>zinc(II) chloride</b>               | Sigma-Aldrich       | 7646-85-7  | $1.5 \times 10^{-5}$ |
