# Supplementary material for: Chemical Ecosystem Selection on Mineral Surfaces Reveals Long-Term Dynamics Consistent with the Spontaneous Emergence of Mutual Catalysis
Source: MDPI journal article supplement (doi:10.3390/life9040080), 2019-10-23
Supplement: s1 [file s1]

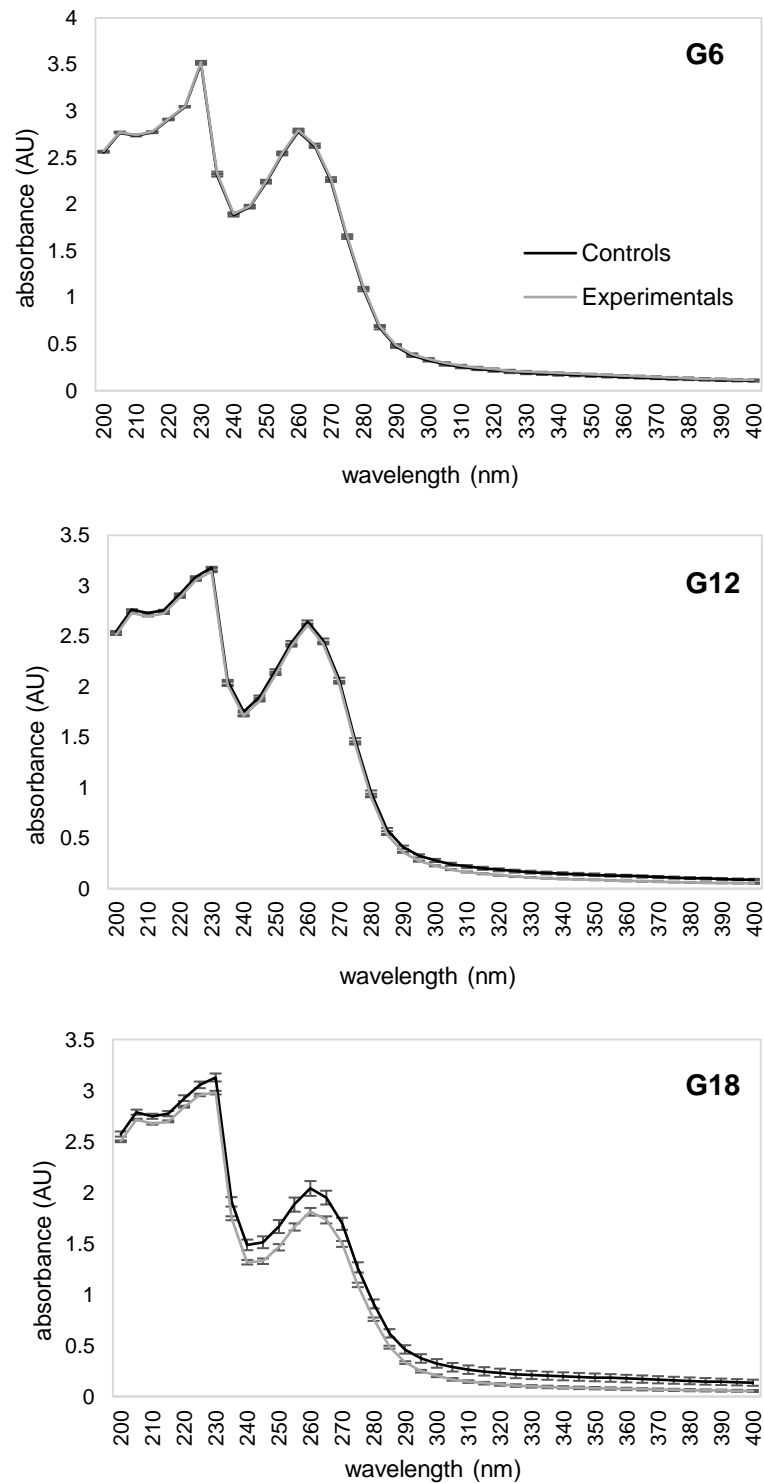

**Figure S3:** Average UV-Vis absorbance spectra of control (black line) and experimental (grey line) lineages at generations 6, 12, and 18. Error bars represent the standard error of the mean.
