# Supplementary material for: Chemical Ecosystem Selection on Mineral Surfaces Reveals Long-Term Dynamics Consistent with the Spontaneous Emergence of Mutual Catalysis
Source: MDPI journal article supplement (doi:10.3390/life9040080), 2019-10-23
Supplement: s1 [file s1]

**Table S3.** Mean absorbance values between 200 and 400 nm for the 10 experimental lineages and 10 controls at generations 6, 12, and 18 of experiment 1 (SE: standard error).

| <b>Generation 6</b> |             |             |             |             |
|---------------------|-------------|-------------|-------------|-------------|
| Wavelength          | CTL Mean    | EXP Mean    | CTL SE      | EXP SE      |
| 200                 | 2.560433333 | 2.5698      | 0.006998393 | 0.004929526 |
| 205                 | 2.7684      | 2.775466667 | 0.00727103  | 0.005115378 |
| 210                 | 2.7364      | 2.7449      | 0.007613057 | 0.005700242 |
| 215                 | 2.770633333 | 2.778366667 | 0.007281949 | 0.005623726 |
| 220                 | 2.908866667 | 2.9131      | 0.007186889 | 0.005636476 |
| 225                 | 3.0468      | 3.0502      | 0.008117815 | 0.004732369 |
| 230                 | 3.510066667 | 3.525833333 | 0.012496986 | 0.013193015 |
| 235                 | 2.313333333 | 2.3349      | 0.016131024 | 0.015919405 |
| 240                 | 1.8835      | 1.900433333 | 0.015346586 | 0.013426734 |
| 245                 | 1.9695      | 1.980633333 | 0.014857151 | 0.013930416 |
| 250                 | 2.237333333 | 2.248233333 | 0.01449837  | 0.014822693 |
| 255                 | 2.538833333 | 2.5507      | 0.013826312 | 0.015634142 |
| 260                 | 2.7803      | 2.794333333 | 0.014289944 | 0.018052992 |
| 265                 | 2.6189      | 2.635233333 | 0.013650713 | 0.016586884 |
| 270                 | 2.253733333 | 2.2749      | 0.014143047 | 0.015621937 |
| 275                 | 1.6432      | 1.665133333 | 0.014441505 | 0.013664934 |
| 280                 | 1.082633333 | 1.102166667 | 0.015596538 | 0.012035167 |
| 285                 | 0.673766667 | 0.693333333 | 0.015686103 | 0.010998567 |
| 290                 | 0.4747      | 0.489266667 | 0.01524603  | 0.010430741 |
| 295                 | 0.377133333 | 0.390333333 | 0.015190757 | 0.010131876 |
| 300                 | 0.3279      | 0.340833333 | 0.015126573 | 0.009912863 |
| 305                 | 0.283033333 | 0.2955      | 0.015033    | 0.009861297 |
| 310                 | 0.255066667 | 0.267533333 | 0.014849257 | 0.009710436 |
| 315                 | 0.234733333 | 0.247066667 | 0.014593563 | 0.009586164 |
| 320                 | 0.2175      | 0.2301      | 0.014333172 | 0.009506486 |
| 325                 | 0.202366667 | 0.2149      | 0.014054951 | 0.009378485 |
| 330                 | 0.190833333 | 0.203366667 | 0.013780372 | 0.009282577 |
| 335                 | 0.1817      | 0.194133333 | 0.013462146 | 0.009136431 |
| 340                 | 0.1742      | 0.186766667 | 0.013209342 | 0.009059041 |
| 345                 | 0.167033333 | 0.179466667 | 0.012901223 | 0.008924646 |
| 350                 | 0.1608      | 0.1731      | 0.01260082  | 0.008742867 |
| 355                 | 0.1543      | 0.1664      | 0.012283532 | 0.008573351 |
| 360                 | 0.147833333 | 0.16        | 0.011931342 | 0.008376141 |
| 365                 | 0.141366667 | 0.153433333 | 0.011542138 | 0.008228276 |

|     |             |             |             |             |
|-----|-------------|-------------|-------------|-------------|
| 370 | 0.135       | 0.1468      | 0.011154515 | 0.007947773 |
| 375 | 0.128733333 | 0.1401      | 0.010697973 | 0.007687863 |
| 380 | 0.123566667 | 0.134866667 | 0.010296403 | 0.007480023 |
| 385 | 0.117666667 | 0.128566667 | 0.009910144 | 0.007143141 |
| 390 | 0.1135      | 0.124033333 | 0.009520244 | 0.006919187 |
| 395 | 0.1089      | 0.1191      | 0.009118903 | 0.006676386 |
| 400 | 0.105333333 | 0.115166667 | 0.008826019 | 0.00644995  |

#### Generation 12

| Wavelength | CTL Mean    | EXP Mean    | CTL SE      | EXP SE      |
|------------|-------------|-------------|-------------|-------------|
| 200        | 2.544166667 | 2.515266667 | 0.007196773 | 0.00232209  |
| 205        | 2.760066667 | 2.7305      | 0.007770032 | 0.002651759 |
| 210        | 2.727833333 | 2.698766667 | 0.007984716 | 0.002741957 |
| 215        | 2.754433333 | 2.724366667 | 0.007738998 | 0.002241299 |
| 220        | 2.9166      | 2.8843      | 0.007730923 | 0.002235066 |
| 225        | 3.0858      | 3.052766667 | 0.00826705  | 0.003557352 |
| 230        | 3.179966667 | 3.141433333 | 0.007965028 | 0.007051471 |
| 235        | 2.058133333 | 2.013733333 | 0.009393639 | 0.006704962 |
| 240        | 1.7553      | 1.712       | 0.010323392 | 0.006382696 |
| 245        | 1.900833333 | 1.8604      | 0.011438805 | 0.007028006 |
| 250        | 2.160866667 | 2.123766667 | 0.012627163 | 0.007780675 |
| 255        | 2.439666667 | 2.405033333 | 0.013786054 | 0.008037939 |
| 260        | 2.6413      | 2.6091      | 0.015033759 | 0.008528894 |
| 265        | 2.462233333 | 2.4274      | 0.015412705 | 0.007587861 |
| 270        | 2.073633333 | 2.0365      | 0.015771606 | 0.006877785 |
| 275        | 1.474633333 | 1.4331      | 0.016016336 | 0.005765283 |
| 280        | 0.9562      | 0.910333333 | 0.016217293 | 0.005274263 |
| 285        | 0.5851      | 0.535933333 | 0.016253528 | 0.005192791 |
| 290        | 0.410266667 | 0.3598      | 0.016222188 | 0.00516055  |
| 295        | 0.324       | 0.272066667 | 0.015959503 | 0.005086188 |
| 300        | 0.278866667 | 0.225966667 | 0.015745268 | 0.005060101 |
| 305        | 0.241733333 | 0.188233333 | 0.01548206  | 0.004990344 |
| 310        | 0.218233333 | 0.164433333 | 0.015299889 | 0.004934374 |
| 315        | 0.200966667 | 0.147066667 | 0.015095469 | 0.004835128 |
| 320        | 0.186333333 | 0.1326      | 0.014909196 | 0.004803813 |
| 325        | 0.173066667 | 0.119966667 | 0.014632185 | 0.004731364 |
| 330        | 0.1634      | 0.110566667 | 0.014309044 | 0.00466376  |
| 335        | 0.1553      | 0.103166667 | 0.013978676 | 0.004532526 |
| 340        | 0.148866667 | 0.097166667 | 0.013686171 | 0.004444938 |

|     |             |             |             |             |
|-----|-------------|-------------|-------------|-------------|
| 345 | 0.142833333 | 0.0916      | 0.013387306 | 0.004355749 |
| 350 | 0.137333333 | 0.087       | 0.012978021 | 0.004221851 |
| 355 | 0.1318      | 0.082333333 | 0.0125977   | 0.004125524 |
| 360 | 0.1256      | 0.077033333 | 0.012192996 | 0.00398079  |
| 365 | 0.120233333 | 0.072733333 | 0.011732161 | 0.003845099 |
| 370 | 0.114566667 | 0.068566667 | 0.011297097 | 0.003681396 |
| 375 | 0.109266667 | 0.0648      | 0.010875744 | 0.003505692 |
| 380 | 0.104766667 | 0.0617      | 0.010395085 | 0.003359472 |
| 385 | 0.1         | 0.058466667 | 0.009976342 | 0.003182175 |
| 390 | 0.095866667 | 0.055933333 | 0.00956887  | 0.002993911 |
| 395 | 0.091933333 | 0.0536      | 0.009208    | 0.002880788 |
| 400 | 0.088733333 | 0.051533333 | 0.008866849 | 0.002764138 |

### Generation 18

| Wavelength | CTL Mean    | EXP Mean    | CTL SE      | EXP SE      |
|------------|-------------|-------------|-------------|-------------|
| 200        | 2.573033333 | 2.501866667 | 0.025047299 | 0.008624302 |
| 205        | 2.787366667 | 2.7145      | 0.024773147 | 0.008562394 |
| 210        | 2.746933333 | 2.674       | 0.024930795 | 0.008935458 |
| 215        | 2.7726      | 2.697433333 | 0.025498875 | 0.009258138 |
| 220        | 2.924966667 | 2.8411      | 0.028385584 | 0.009645644 |
| 225        | 3.0548      | 2.955833333 | 0.032227743 | 0.012442779 |
| 230        | 3.127466667 | 2.979033333 | 0.03907769  | 0.017674713 |
| 235        | 1.9082      | 1.7473      | 0.046082628 | 0.01925158  |
| 240        | 1.486366667 | 1.3166      | 0.051957667 | 0.022540762 |
| 245        | 1.512366667 | 1.3262      | 0.057930622 | 0.026912364 |
| 250        | 1.666233333 | 1.462933333 | 0.063829327 | 0.031442825 |
| 255        | 1.881233333 | 1.6619      | 0.069269281 | 0.035559562 |
| 260        | 2.0393      | 1.810733333 | 0.072544722 | 0.037847611 |
| 265        | 1.9497      | 1.7315      | 0.067759874 | 0.034894367 |
| 270        | 1.692766667 | 1.4957      | 0.059579993 | 0.02879648  |
| 275        | 1.265966667 | 1.0942      | 0.050212203 | 0.021633893 |
| 280        | 0.9077      | 0.7583      | 0.044159197 | 0.016538623 |
| 285        | 0.619433333 | 0.483766667 | 0.041276416 | 0.013900936 |
| 290        | 0.4621      | 0.3328      | 0.041122153 | 0.01328677  |
| 295        | 0.373166667 | 0.2485      | 0.04187179  | 0.013230984 |
| 300        | 0.3248      | 0.203466667 | 0.042300447 | 0.013245479 |
| 305        | 0.287366667 | 0.168033333 | 0.042062553 | 0.013065981 |
| 310        | 0.263733333 | 0.146466667 | 0.041723779 | 0.012896391 |
| 315        | 0.2469      | 0.131       | 0.041348201 | 0.012817361 |

|     |             |             |             |             |
|-----|-------------|-------------|-------------|-------------|
| 320 | 0.232566667 | 0.118333333 | 0.040947138 | 0.012683814 |
| 325 | 0.220466667 | 0.107533333 | 0.040547982 | 0.012530871 |
| 330 | 0.211266667 | 0.0998      | 0.040085017 | 0.012425261 |
| 335 | 0.204166667 | 0.094066667 | 0.039615107 | 0.012269407 |
| 340 | 0.198233333 | 0.089533333 | 0.03912049  | 0.012177337 |
| 345 | 0.192666667 | 0.085466667 | 0.038628087 | 0.012073191 |
| 350 | 0.187666667 | 0.082066667 | 0.038077834 | 0.01192761  |
| 355 | 0.182233333 | 0.078533333 | 0.037489284 | 0.011753786 |
| 360 | 0.1763      | 0.074666667 | 0.036832068 | 0.011558373 |
| 365 | 0.170666667 | 0.0713      | 0.036082339 | 0.011398727 |
| 370 | 0.164766667 | 0.067833333 | 0.035247421 | 0.011166803 |
| 375 | 0.1593      | 0.065033333 | 0.034367569 | 0.010914071 |
| 380 | 0.154066667 | 0.0626      | 0.033433918 | 0.010631527 |
| 385 | 0.149       | 0.0603      | 0.03253345  | 0.010334567 |
| 390 | 0.1443      | 0.058233333 | 0.03157633  | 0.010065345 |
| 395 | 0.139966667 | 0.056533333 | 0.030737772 | 0.00979784  |
| 400 | 0.135666667 | 0.0547      | 0.029892535 | 0.009534615 |
